# Supplementary material
Source: ML conference proceedings conference paper supplement (https://openaccess.thecvf.com/content/WACV2022/html/Lohit_Model_Compression_Using_WACV_2022_paper.html)
Supplement: Supplementary file 1 [file Lohit_Model_Compression_Using_WACV_2022_supplemental.pdf]

# Supplementary Material: Model Compression Using Optimal Transport

Suhas Lohit Michael Jones  
Mitsubishi Electric Research Laboratories, Cambridge, MA, USA  
slohit@merl.com mjones@merl.com

## 1. Number of parameters in the teacher and student networks used in the paper

| Datasets         | Teacher architectures | # weights ( $\times 10^6$ ) | Student architectures | # weights ( $\times 10^6$ ) | % reduction in # weights |
|------------------|-----------------------|-----------------------------|-----------------------|-----------------------------|--------------------------|
| CIFAR-100 / SVHN | resnet110             | 1.74                        | resnet20              | 0.28                        | 83.97                    |
|                  | resnet56              | 0.86                        |                       |                             | 70.00                    |
|                  | resnet32x4            | 7.43                        | resnet8x4             | 1.23                        | 83.41                    |
|                  | WRN-40-2              | 2.25                        | WRN-16-2              | 0.70                        | 68.81                    |
|                  | vgg13                 | 9.46                        | vgg8                  | 3.97                        | 58.10                    |
| ImageNet         | ResNet-34             | 21.28                       | ResNet-18             | 11.17                       | 48.00                    |

Table 1. The number of parameters in the networks used in this paper and the compression achieved for every teacher-student pair.
